# Supplementary material
Source: PubMed Central journal article supplement (PMC4183661)
Supplement: ja505733u_si_001.pdf [file ja505733u_si_001.pdf]

## **Supporting Information**

**for**

### **A Short DNA Sequence Confers Strong Bleomycin Binding to Hairpin DNAs**

Chenhong Tang, Ananya Paul, Mohammad P. Alam, W. David Wilson and Sidney  
M. Hecht

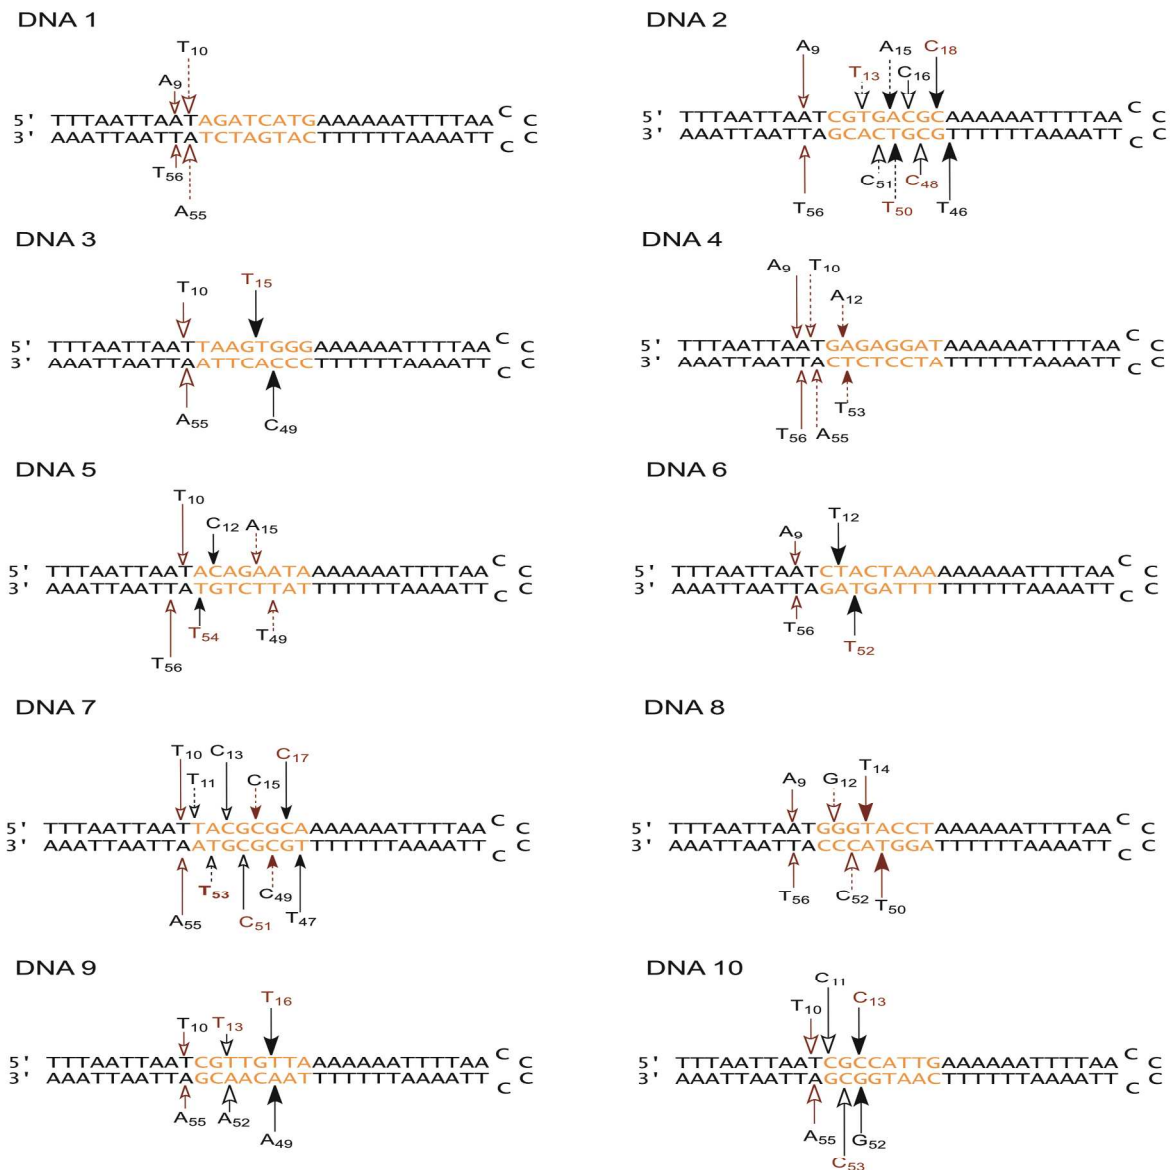

Figure S1. Summary of sites of Fe•BLM induced cleavage of hairpin DNAs 1 – 10.<sup>9</sup> Orange bases indicate randomized region of the original hairpin DNA library. Arrows of the same shape and color indicate paired cleavages. Black arrows correspond to coupled double-strand cleavage events, whereas red arrows correspond to non-coupled DNA cleavage events, which result from two independent single-strand cleavages on opposite strands. Nucleotides colored in red indicate primary sites of coupled double-strand cleavage events.

DNA 12

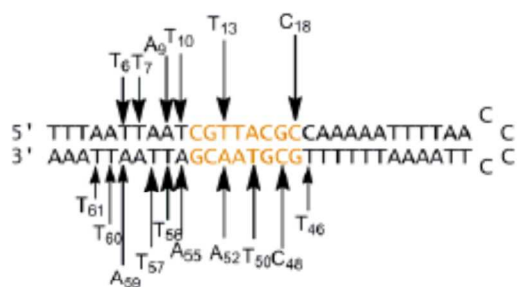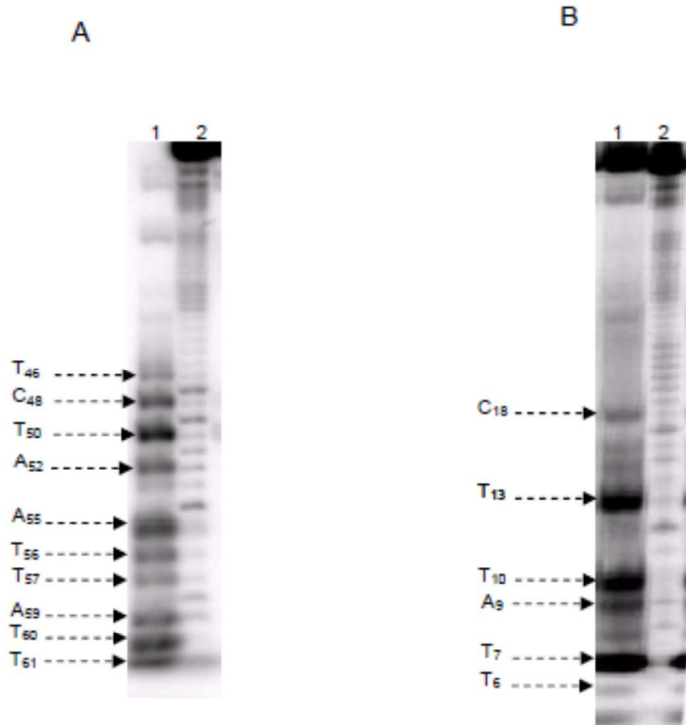

Figure S2. (A) Sequence-selective cleavage of 3'-<sup>32</sup>P end-labeled 64-nt hairpin DNA **12** by BLM A<sub>5</sub>: lane 1, 1.5 μM Fe(II)•BLM A<sub>5</sub>; lane 2, G+A lane. (B) Sequence-selective cleavage of 5'-<sup>32</sup>P end-labeled 64-nt hairpin DNA **12** by BLM A<sub>5</sub>: lane 1, 1.5 μM Fe(II)•BLM A<sub>5</sub>; lane 2, G+A lane.

DNA 13

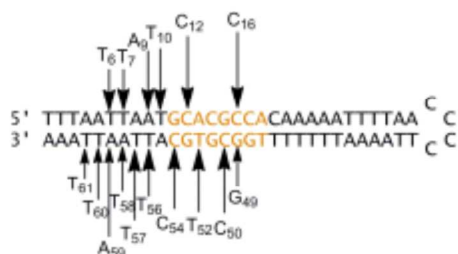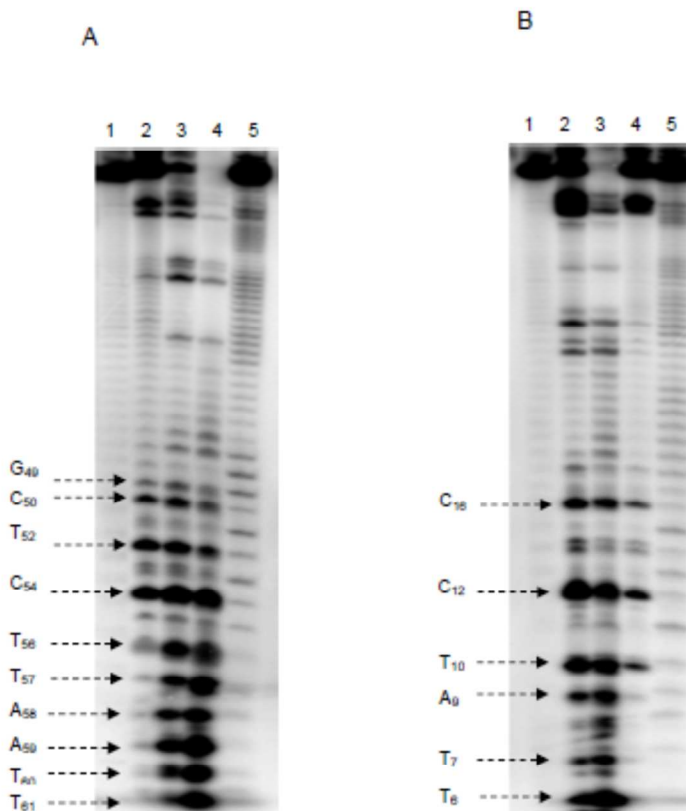

Figure S3. (A) Sequence-selective cleavage of 3'-<sup>32</sup>P end-labeled 64-nt hairpin DNA **13** by BLM A<sub>5</sub>: lane 1, radiolabeled DNA **13** alone; lane 2, 0.5 μM Fe(II)•BLM A<sub>5</sub>; lane 3, 1 μM Fe(II)•BLM A<sub>5</sub>; lane 4, 2 μM Fe(II)•BLM A<sub>5</sub>; lane 5, G+A lane. (B) Sequence-selective cleavage of 5'-<sup>32</sup>P end-labeled 64-nt hairpin DNA **13** by BLM A<sub>5</sub>: lane 1, radiolabeled DNA **13** alone; lane 2, 1 μM Fe(II)•BLM A<sub>5</sub>; lane 3, 2 μM Fe(II)•BLM A<sub>5</sub>; lane 4, 0.5 μM Fe(II)•BLM A<sub>5</sub>; lane 5, G+A lane.
